# Supplementary material
Source: HighWire-hosted journal article supplement (http://ip.bmjjournals.com/highwire/filestream/145785/field_highwire_adjunct_files/0/134228webonlyapp.pdf)
Supplement: 134228webonlyapp.pdf [file 134228webonlyapp.pdf]

Appendix A. Frequency of Target Recalled Products Found Online by Category Type

| <b>Category</b>                  | <b># of Target Items</b> | <b>Target Products Found</b>                                  | <b>CPSC recall<sup>a</sup></b> | <b>Total # Listings</b> |
|----------------------------------|--------------------------|---------------------------------------------------------------|--------------------------------|-------------------------|
| <b>Activity Center</b>           | 7                        | Graco® Stationary Entertainers™                               | 97-126                         | 3                       |
|                                  |                          | Safety 1 <sup>st</sup> ® Bouncing Buggy Toys                  | 98-125                         | 1                       |
|                                  |                          | Fisher-Price® Bounce n 'Play™                                 | 00-092                         | 5                       |
|                                  |                          | Activity Domes/Infant Swings                                  |                                |                         |
| <b>Arts/Crafts/<br/>Hobby</b>    | 6                        | Battat™ Inc Drumsticks/ Band Sets                             | 03-1103                        | 3                       |
| <b>Baby Walker</b>               | 6                        | Kolcraft® Toy Attachments on<br>Baby Walkers                  | 03-043                         | 12                      |
| <b>Carrier</b>                   | 2                        | Evenflo® “Hike ‘N Roll” Child<br>Carriers                     | 98-165                         | 3                       |
|                                  |                          | Kelty® Backpack Child Carriers                                | 00-037                         | 12                      |
|                                  |                          |                                                               |                                |                         |
| <b>Children’s<br/>Furniture</b>  | 12                       | Kmart™ Corp “Little Ones” Lamps                               | 00-093                         | 3                       |
|                                  |                          | Simmons™ Cribs                                                | 01-087                         | 11                      |
|                                  |                          | Gerry® and Evenflo® Portable<br>Wood Cribs                    | 03-074                         | 2                       |
|                                  |                          | Baby's Dream® Furniture Cribs                                 | 03-121                         | 3                       |
|                                  |                          | Coaster® Co. of America Bunk Beds                             | 04-135                         | 15                      |
| <b>Doll Item</b>                 | 5                        | Lovee Doll & Toy Co., Inc. Dolls                              | 03-059                         | 1                       |
|                                  |                          | Schylling Associates Inc.<br>Jack-in-the-Box Type Toys        | 04-050                         | 19                      |
|                                  |                          |                                                               |                                |                         |
| <b>Educational<br/>Materials</b> | 14                       | Let’s Start™ Numbers & Optical<br>Illusions Lab Advantage Pub | 01-193                         | 1                       |
|                                  |                          | Kids II Inc.™ Children’s Mirror Books                         | 04-123                         | 1                       |
| <b>Infant Care</b>               | 7                        | Gerry® Baby Products Model 602<br>Deluxe Baby Monitors        | 97-002                         | 1                       |
|                                  |                          | Fisher-Price® Baby Jumper Seats                               | 00-146                         | 6                       |
| <b>Infant<br/>Furniture</b>      | 8                        | Century® Fold-N-Go Playard                                    | 97-026                         | 2                       |
|                                  |                          | Evenflo® Happy Camper<br>Portable Play Yards                  | 97-146                         | 8                       |
|                                  |                          | Kids II™ Bouncer Seats                                        | 00-116                         | 2                       |
|                                  |                          | Kids Line Inc. Le Cradle<br>Bassinets                         | 00-167                         | 1                       |
|                                  |                          | Fisher-Price® Portable                                        | 01-210                         | 16                      |

Bassinets

|                           |    |                                                                                                                                                  |                                                |                       |
|---------------------------|----|--------------------------------------------------------------------------------------------------------------------------------------------------|------------------------------------------------|-----------------------|
| <b>Kids Meal Item</b>     | 7  | Doc DeLorean Car: McDonalds® Toy                                                                                                                 | 92-083                                         | 2                     |
| <b>Novelty Item</b>       | 8  | KB Gear Cozy Coupe<br>Computer Mouse                                                                                                             | 02-048                                         | 2                     |
| <b>Riding Toy</b>         | 10 | Fisher Price® Power Wheels<br>Harley-Davidson Riding Vehicle                                                                                     | 00-175                                         | 4                     |
|                           |    | Tek Nek® Riding Vehicle                                                                                                                          | 00-177                                         | 1                     |
|                           |    | Alpha International Pedal Cars                                                                                                                   | 02-104                                         | 1                     |
| <b>Safety Device</b>      | 4  | TV Guard®<br>Safety 1 <sup>st</sup> ® Cabinet, Drawer Latches                                                                                    | 98-172<br>01-211                               | 2<br>1                |
| <b>Sports-Related</b>     | 6  | Lil' Sport Spill Proof Sport Bottle                                                                                                              | 99-136                                         | 1                     |
| <b>Stroller</b>           | 7  | Cosco® Two Ways™ Tandem<br>InSTEP® LLC Jogging Strollers<br>Kolcraft® LiteSport<br>Century® Multi-Use Strollers<br>Baby Trend Passport Strollers | 99-062<br>00-080<br>01-214<br>01-172<br>04-136 | 3<br>4<br>1<br>9<br>1 |
| <b>Stuffed Animal</b>     | 10 | No identified products found                                                                                                                     |                                                | 0                     |
| <b>Swing</b>              | 3  | Century Lil' Napper Infant Swings<br>Fisher-Price® Lift & Lock Swings/<br>"Get up and Go" Walker                                                 | 97-180<br>00-168                               | 1<br>10               |
| <b>Toy Vehicle</b>        | 7  | MDK Inc. Model Trains<br>Tonka Soft Walkin' Wheels<br>K'NEX® Children's Toys                                                                     | 97-053<br>97-064<br>04-065                     | 2<br>8<br>1           |
| <b>Water-related Item</b> | 7  | Spin Master Water Rocket Toys                                                                                                                    | 01-158                                         | 5                     |
| <b>Other Toys</b>         | 5  | No identified products found                                                                                                                     |                                                | 0                     |

Note: <sup>a</sup> Product recall numbers are assigned by the Consumer Product Safety Commission (CPSC), with the first two digits indicating the year the product was initially recalled. Additional recall information on these products can be found at [www.cpsc.gov](http://www.cpsc.gov).
